# Supplementary material
Source: publisher site journal article supplement (https://www.dovepress.com/article/271213)
Supplement: Supplementary file 1 [file get_supplementary_file.php]

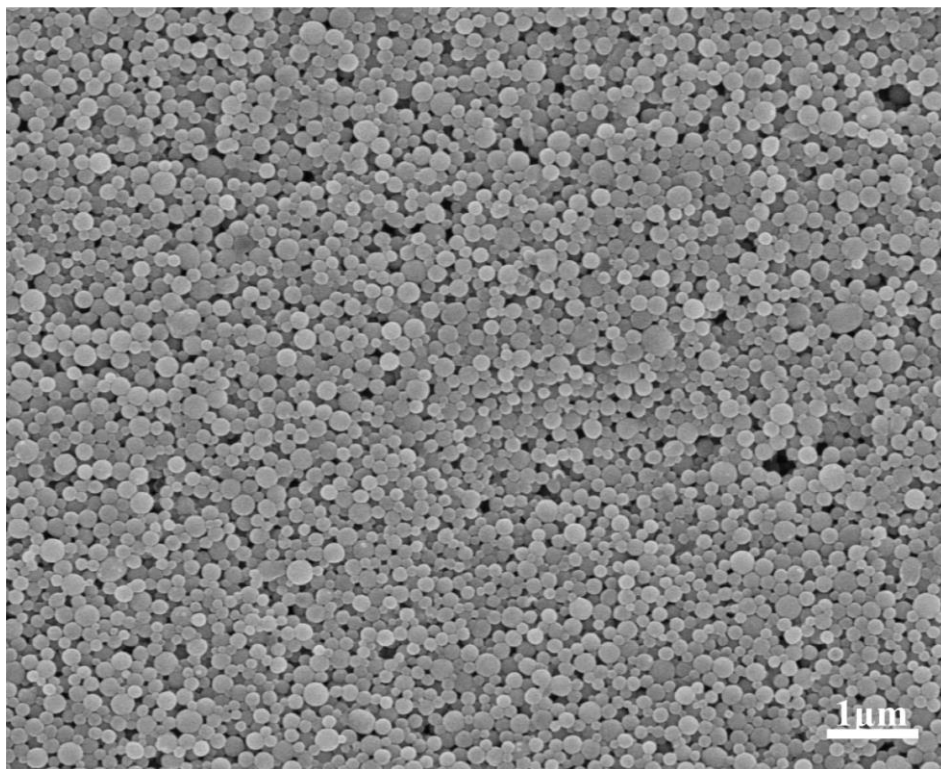

S 1 The FESEM image of DS NPs, scale bar: 1 μm.

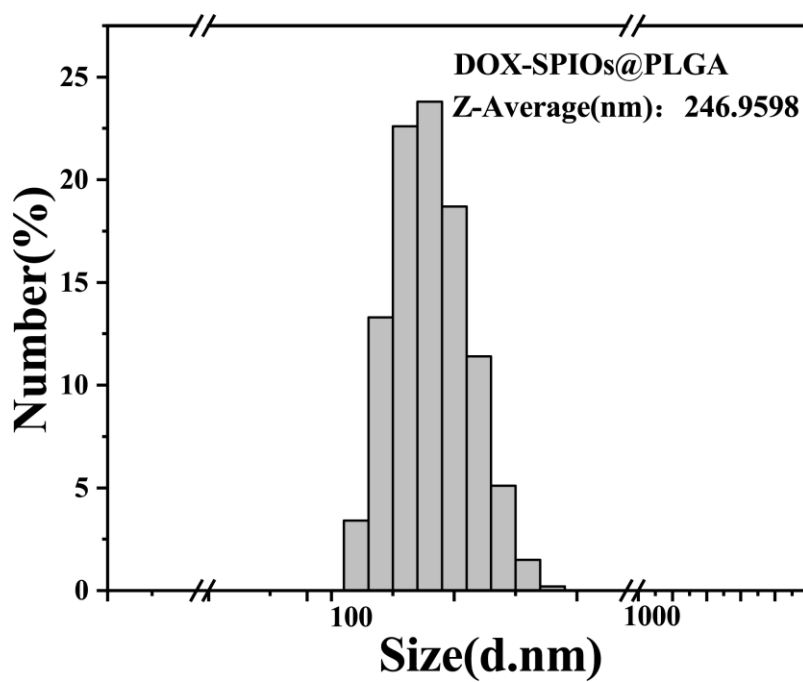

S 2 The size distribution of DS NPs.

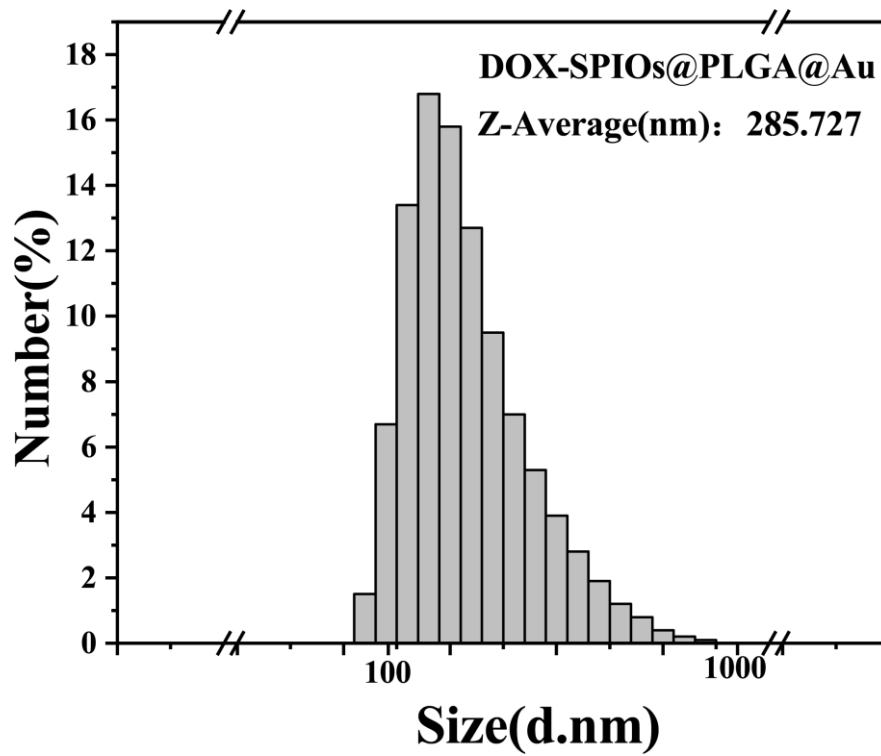

S 3 The size distribution of DSG NPs.

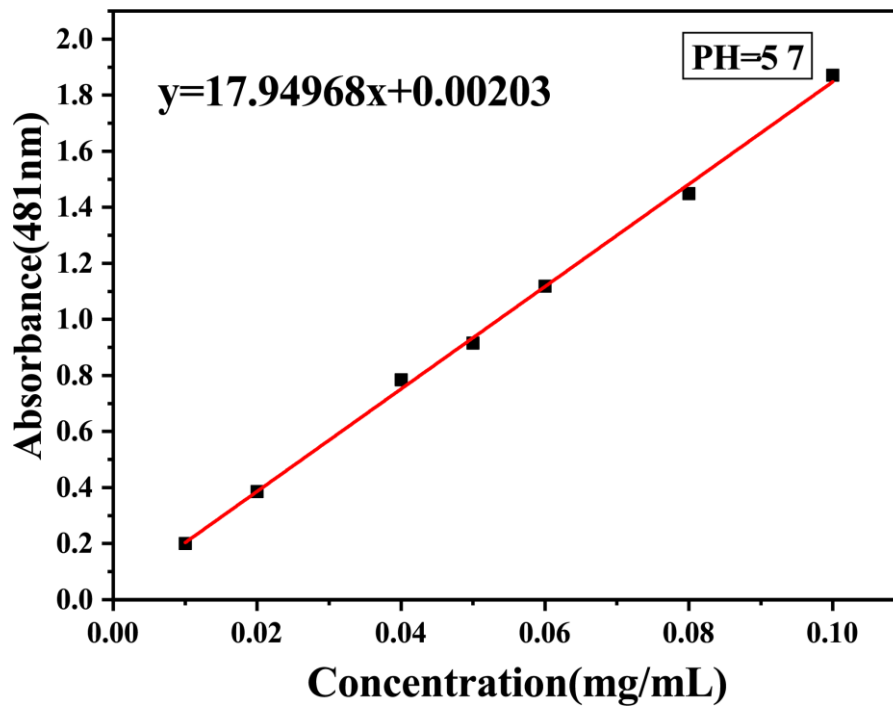

S 4 The concentration-light absorption standard curve of DOX at PH=5.7.

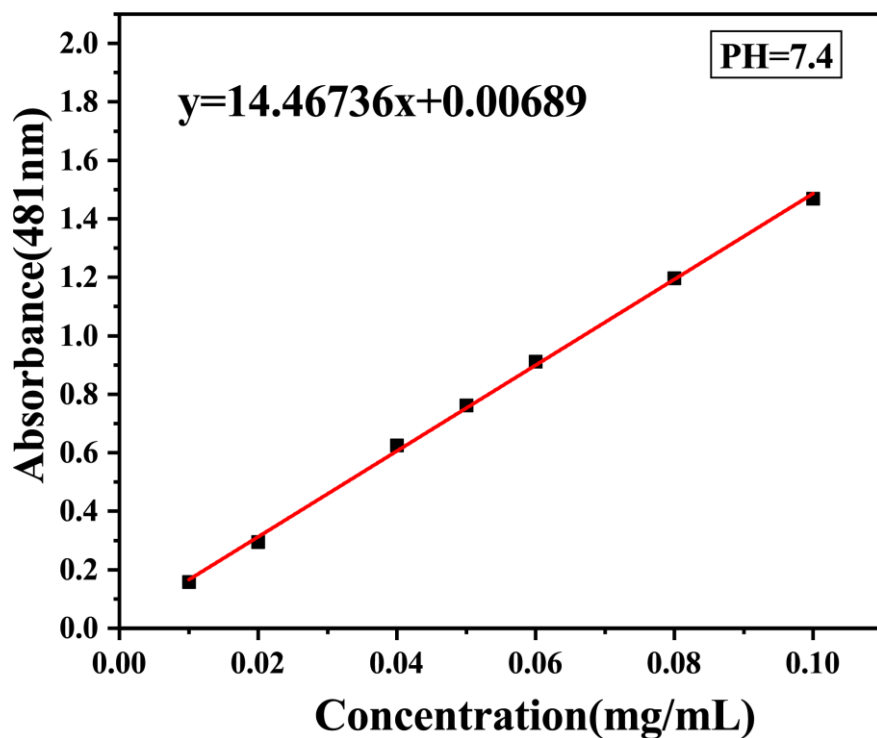

S 5 The concentration-light absorption standard curve of DOX at PH=7.4.

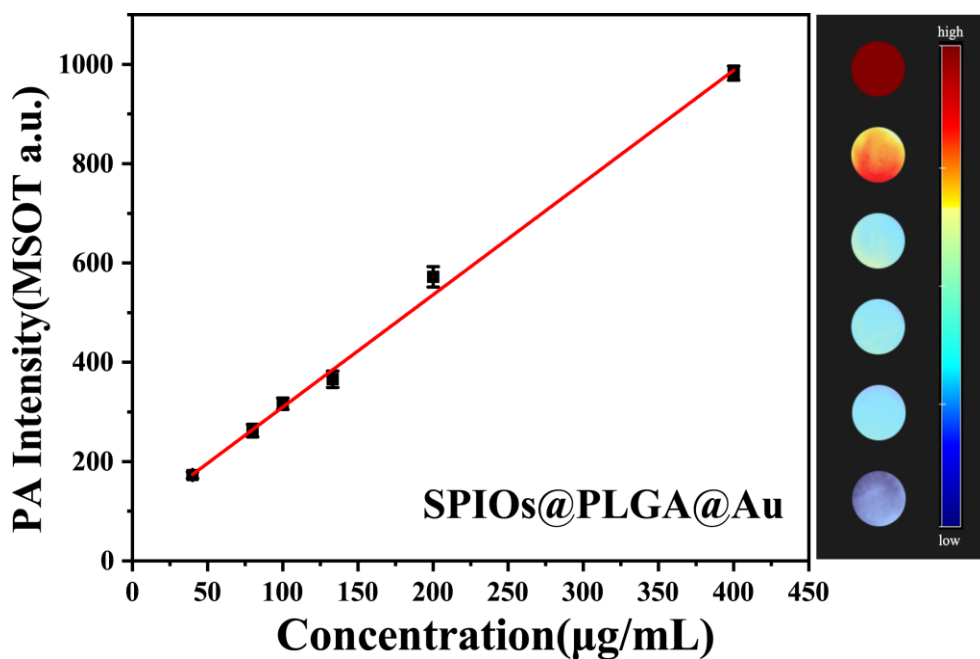

S 6 The concentration- PA signal intensity standard curve of SG NPs.

Data expressed as mean  $\pm$ SD, n = 3.

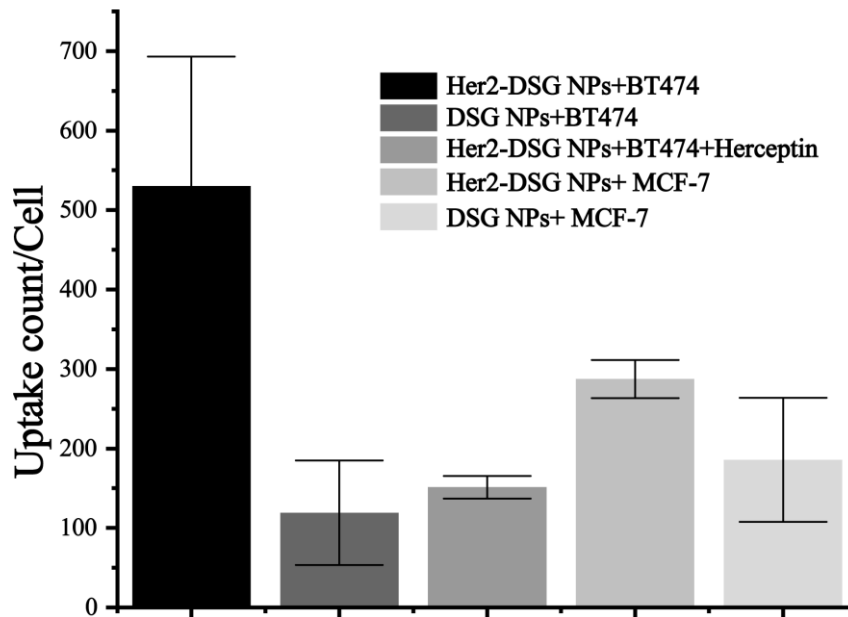

S 7 The quantitative results of the count of NPs uptake by cell in different groups. Data expressed as mean  $\pm$  SD, n = 3.

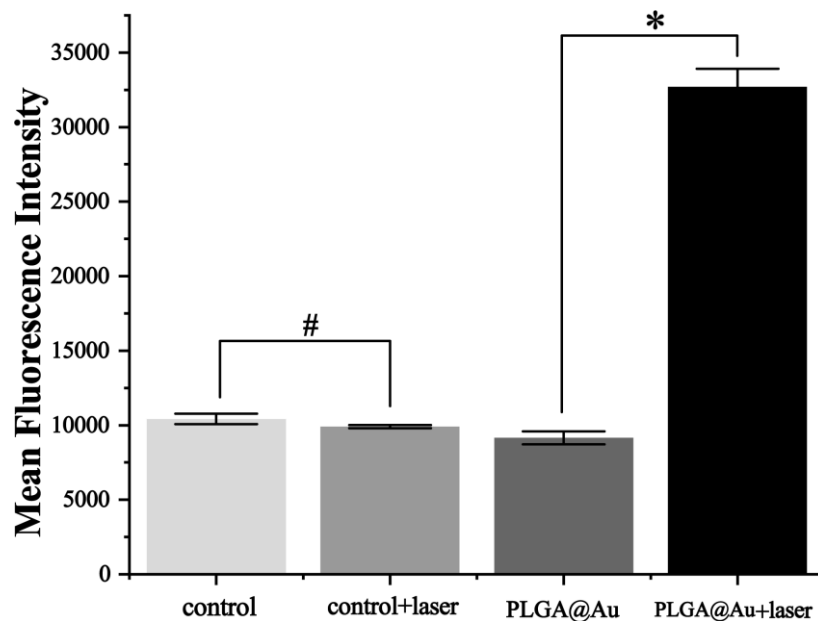

### BT474

S 8 The flow cytometry result of the evaluation of photothermal effect on the BT474 cell expression of HSP 70. Data expressed as mean  $\pm$  SD, n = 3, #p>0.05, \*p<0.05.

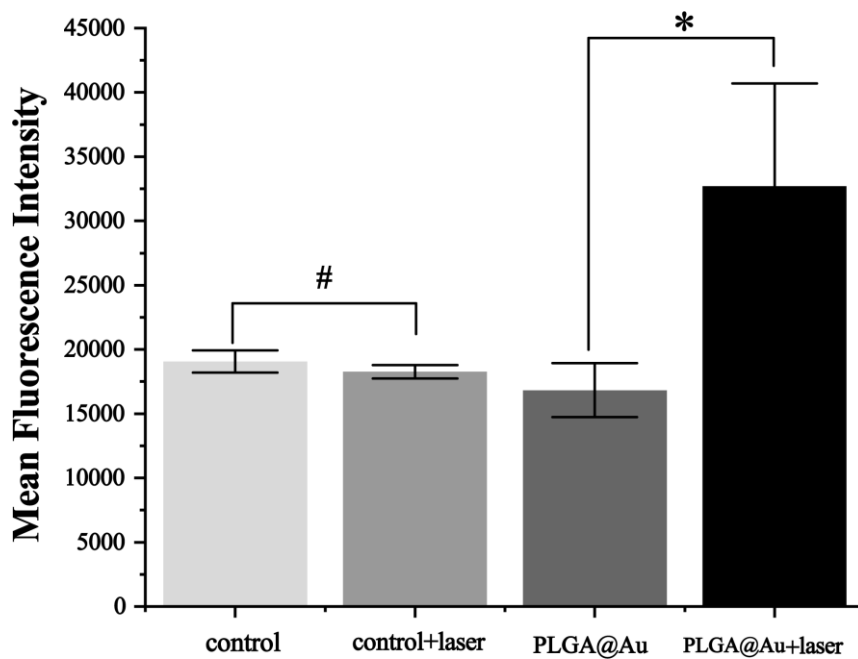

### BT474/Adr

S 9 The flow cytometry result of the evaluation of photothermal effect on the BT474/Adr cell expression of HSP 70. Data expressed as mean  $\pm$  SD, n = 3, #p>0.05, \*p<0.05.

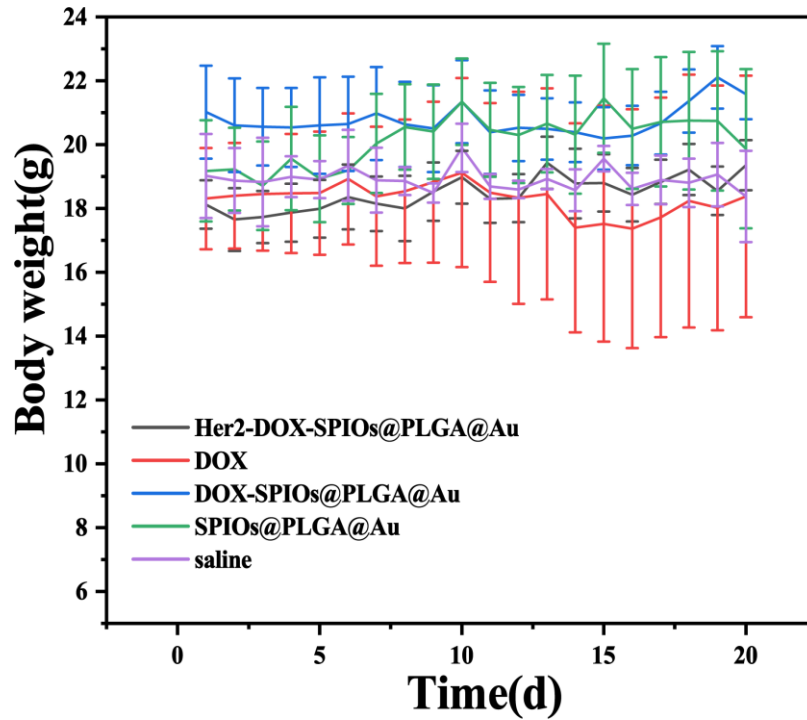

S 10 Mice body weight in groups without laser irradiation during the 20-day study period. Data expressed as mean  $\pm$  SD, n = 3.

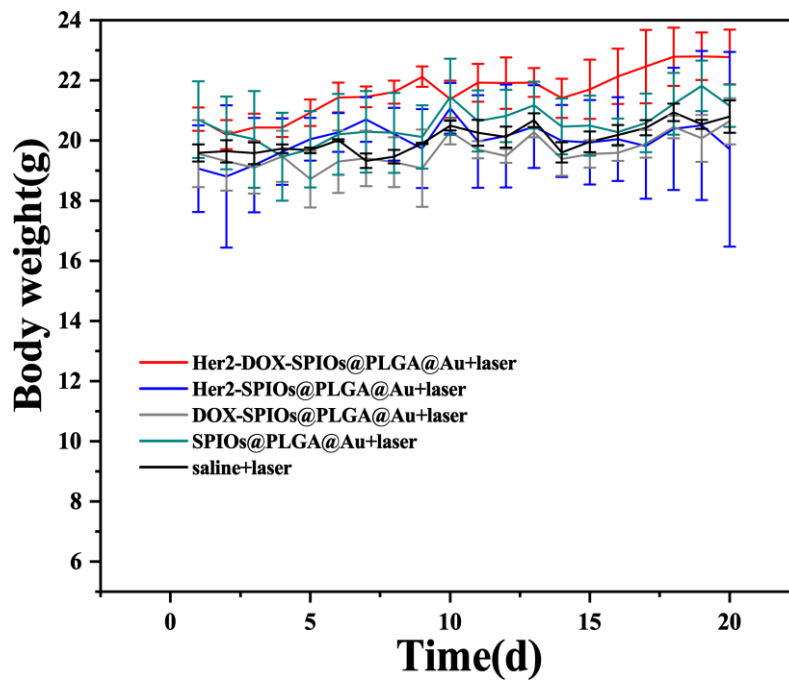

S 11 Mice body weight in groups with laser irradiation during the 20-day study period. Data expressed as mean  $\pm$  SD, n = 3.
